# Supplementary material for: Expanding the MECP2 network using comparative genomics reveals potential therapeutic targets for Rett syndrome
Source: eLife. 2021 Aug 6;10:e67085. doi: 10.7554/eLife.67085 (PMC8346285; doi:10.7554/eLife.67085)
Supplement: Supplementary file 1. [file elife-67085-supp1.csv]

Gene	Eukayotes_rank	Mammals_rank
MECP2	1	1
BANP	3463	2
FAM221B	973	3
TCF20	5858	4
PM20D2	10224	5
GALM	6936	6
DTL	3620	7
MYOD1	5312	8
SLC32A1	10856	9
SEC11C	11150	10
PLG	13917	11
DNMT1	1866	12
MMAB	10736	13
PLPBP	6967	14
UBE4B	15143	15
MANSC1	2041	16
GTF3C4	4117	17
NMRK1	12641	18
PIF1	7423	19
TMA16	5728	20
GSS	10929	21
MFSD4A	4428	22
GHITM	19146	23
CTNNBL1	14235	24
MAPKAP1	6148	25
CDCP1	4223	26
CNBD2	104	27
CFB	86	28
CCDC158	76	29
H6PD	3265	30
STX6	12195	31
ACP5	615	32
KEAP1	5756	33
GRIN3A	8503	34
ITGAD	4272	35
DPP8	17613	36
SEC11A	12471	37
TRIML1	579	38
HPS1	1199	39
MFAP4	6285	40
PPT2	473	41
PHF5A	10675	42
SEC11B	14037	43
RNASEH2B	3447	44
POT1	2014	45
SHTN1	6382	46
UPK3A	871	47
DPP9	17149	48
ABT1	884	49
PIGU	14731	50
KIAA0556	6624	51
YBEY	584	52
CREB3L1	12357	53
SNRNP35	8047	54
ASF1A	10785	55
NOL10	10488	56
MINPP1	876	57
TCP11L1	14802	58
WASHC4	8594	59
OPN5	2098	60
CMBL	6192	61
NMI	1309	62
RANGAP1	17620	63
FGG	4121	64
SUSD6	6255	65
WIPF2	116	66
DLGAP4	4396	67
IQSEC2	7730	68
ASF1B	8386	69
RALGAPB	7369	70
MED24	1823	71
PCMT1	15245	72
EIF2AK4	7582	73
RSL24D1	9558	74
SLC45A3	4255	75
RENBP	12	76
DDX20	4814	77
TRPC4AP	4600	78
GMIP	11716	79
PBDC1	9522	80
MYBPC3	13184	81
RBM39	15183	82
ZIC3	12990	83
ITGAM	4005	84
RPL30	13023	85
GNL1	545	86
TP53INP1	3838	87
C2orf71	3063	88
KLHL6	14943	89
MAPK8IP2	11551	90
LMF2	3257	91
TDO2	10302	92
SYNGAP1	14583	93
TNFRSF11A	4589	94
MRPL4	1342	95
RPL26L1	7232	96
DNAJB11	9529	97
RPL26	7210	98
DEK	5617	99
GRN	747	100
NSUN2	9278	101
LECT2	4458	102
ALDH7A1	14703	103
DENND6B	13215	104
HRH4	14790	105
ARMC5	2	106
DENND6A	12201	107
RIF1	2123	108
WDR54	1416	109
CDC37	7105	110
DMBX1	17720	111
RCC1L	11990	112
RRNAD1	1132	113
MEDAG	33	114
POU4F3	10908	115
CCDC34	4980	116
XAB2	2441	117
GKN1	992	118
HOXB1	6612	119
ZNRD1	1002	120
DSN1	617	121
TTI1	6519	122
POLR3H	13196	123
NDP	6753	124
XRCC6	12804	125
SLC15A4	9975	126
EPOR	21	127
HOXA7	17601	128
KLF6	19890	129
DDX58	7880	130
C1orf50	7978	131
ALK	7553	132
RCC2	1436	133
RHOJ	17486	134
ABCB9	14728	135
MADD	10756	136
PFDN4	10211	137
ACO2	19137	138
NCAPH2	146	139
PHOSPHO1	2930	140
TUBGCP6	963	141
SNN	8235	142
ZFHX3	7111	143
IRAK1	173	144
NOC4L	8560	145
NODAL	4044	146
RNF135	955	147
UQCC1	10637	148
RNF121	13126	149
WDR63	5147	150
CEP250	518	151
PSTK	2082	152
BAG3	6454	153
DNM2	18786	154
BORCS5	12827	155
SECISBP2L	4657	156
TULP1	7323	157
STX10	10868	158
SKIV2L	2675	159
AGTRAP	4199	160
LRRC49	11109	161
NPPA	921	162
RNF175	13254	163
SPATA46	1562	164
RBBP8	5664	165
BIVM-ERCC5	4712	166
NR1D1	7994	167
GEMIN2	4292	168
CDKN3	4798	169
CRYBA1	5124	170
DET1	4325	171
VSTM2L	566	172
POMT2	12041	173
ACKR3	4134	174
ISG15	5860	175
RBPJL	17988	176
N4BP3	596	177
CYP24A1	9516	178
PSTPIP2	15401	179
LRP10	2868	180
ALLC	1906	181
EIF6	7748	182
PRDM1	14858	183
TMEM9B	16579	184
MARCH5	9842	185
SLC39A13	18671	186
KCNQ1	18355	187
TPCN1	8380	188
KLHL26	12623	189
CUTA	3888	190
TGIF2	3400	191
UTP20	8136	192
PFDN2	1876	193
NRN1	1021	194
DPH7	6490	195
LPAR2	8930	196
SPRYD7	13334	197
PSTPIP1	17308	198
PWP1	8131	199
KCTD21	8755	200
UPK2	677	201
DAXX	23	229
ZMYND15	136	263
TMEM179B	198	264
FNBP4	92	268
FAM111A	60	312
C19orf67	80	334
MRPL9	159	351
TCAP	77	375
TMEM232	154	421
INTS5	102	432
HAUS7	47	512
ILDR1	142	550
STPG1	199	800
KIAA1958	160	815
NELFE	56	900
CCDC150	26	925
HEXIM2	82	927
POLR3D	18	989
ILDR2	178	1010
DDIT4L	31	1142
INO80B-WBP1	45	1152
INO80B	43	1164
LRRC36	143	1228
NFKBIL1	24	1285
BABAM1	175	1632
PRRT3	51	1634
KIAA0825	190	1709
HEXIM1	158	1833
HAUS5	15	1843
FBXL12	93	1935
IL17RC	130	2015
OAZ2	197	2021
CARD6	55	2105
SMG9	97	2125
MAG	128	2138
TAPBP	69	2431
MAGEH1	135	2467
ZBED8	201	2596
KIZ	155	2946
CATSPERG	122	3256
ICAM3	192	3268
NOSTRIN	109	3354
CFAP157	49	3508
PRKRA	106	3821
PCED1A	148	3873
CXorf38	20	3908
EPM2AIP1	61	3990
IKBKG	138	4037
ATXN7L3	108	4040
SNRNP25	153	4162
ICAM1	140	4444
CCDC155	134	4620
CNTROB	36	4707
FBXO24	32	4769
NUTM1	141	4781
KIAA0753	152	4860
ZCWPW1	149	4950
TTC22	19	4990
MED25	8	5058
ARPIN	40	5155
CCHCR1	35	5289
HLA-DPA1	123	5510
RYDEN	81	5688
DNMT3L	180	5813
C17orf53	67	5952
EXPH5	194	5965
TFPT	54	5998
PGLYRP2	46	6082
ANKAR	90	6290
ZNF862	147	6456
CEP152	172	6466
C6orf136	16	6548
C14orf28	37	6565
TONSL	53	6584
SCNM1	110	6807
CIART	63	6842
MRO	179	6866
STRCP1	127	6895
STRC	150	6900
MAGEE2	139	6907
TTC23L	167	6983
BAHCC1	187	7005
C1orf109	103	7070
FSCN3	59	7076
CCDC17	163	7180
MBD1	6	7331
GPS2	7	7638
LIM2	118	7678
PIH1D2	169	7768
AKAP3	117	7789
NRM	58	8045
WDR6	111	8074
HLA-DRA	52	8275
HAX1	44	8312
LSR	41	8460
NCKAP5L	137	8476
DZIP3	189	8757
TMEM236	171	8780
MED29	124	8956
CCDC105	132	9009
RNF31	28	9012
ELP5	113	9051
TCF19	195	9072
PPP1R32	144	9175
NUDT22	91	9243
CALCOCO1	105	9409
SNAPC2	161	9667
FUZ	50	9714
BAG6	9	9804
LIN37	13	9811
CCDC22	42	9909
TMUB2	115	9921
GIF	107	9969
TYSND1	182	10019
TTC23	22	10279
URGCP	14	10392
HLA-DOA	78	10661
OAZ3	165	10834
SIGLEC9	145	11267
SHARPIN	131	11499
CEP72	196	11693
TEFM	11	11836
MAGED1	29	11886
C14orf93	48	12096
PRF1	62	12224
CCDC142	71	12522
ACIN1	74	12537
MEA1	75	12561
TMEM101	68	12695
C7orf43	166	12840
PORCN	185	13010
PQBP1	183	13044
C11orf84	188	13166
TMEM143	120	13179
ECM1	30	13237
TDRKH	85	13308
THTPA	191	13348
CCDC106	65	13450
PPP1R10	164	13780
GGCX	162	13788
TARBP2	186	13902
MROH7	84	13920
AKNA	89	13971
NFATC2IP	156	13991
TEP1	72	14211
THAP7	151	14373
MROH7-TTC4	87	14427
OS9	168	14594
XRCC1	66	14631
TMEM25	83	14753
TRMO	101	15110
CEBPE	112	15272
HPX	79	15344
CCDC110	181	15445
KPTN	121	15488
PTOV1	25	15538
GRIPAP1	34	15593
PELP1	39	15640
TINF2	174	16053
MAGED2	64	16207
WDR13	96	16272
DDIT4	184	16324
MAGED4	94	16374
ODF3L1	88	16386
HAUS4	10	16425
NEU1	125	16486
RTP2	129	16501
OCLN	38	16676
TMEM54	98	16697
B4GALNT2	5	16698
SPRYD4	126	17019
AKAP4	99	17155
PGLYRP3	177	17174
RTP1	70	17300
SIGLEC7	193	17347
B4GALNT1	4	17434
PGLYRP4	157	17992
BLVRB	200	18057
THOC6	17	18173
DCAF15	3	18542
AP5B1	57	19161
EXD1	100	19204
TCN2	27	19295
VPS9D1	176	19319
SFTPB	170	19362
ARMC12	95	19382
DOK1	73	19580
GLYAT	114	19866
HLA-DQA1	133	20010
HLA-DQA2	119	20143
